# Supplementary material
Source: PubMed Central journal article supplement (PMC7372505)
Supplement: NIHMS1602302-supplement-Supplementary_methods_and_figures.pdf [file NIHMS1602302-supplement-Supplementary_methods_and_figures.pdf]

Supporting Information for:

**Generation of Recombinant Mammalian Selenoproteins through Genetic Code Expansion with Photocaged Selenocysteine**

Jennifer C. Peeler, Julia A. Falco, Rachel E. Kelemen, Masahiro Abo, Benjamin V. Chartier, Laura C. Edinger, Jingjia Chen, Abhishek Chatterjee\*, Eranthie Weerapana\*

Department of Chemistry, Boston College, Chestnut Hill, Massachusetts 02467, United States

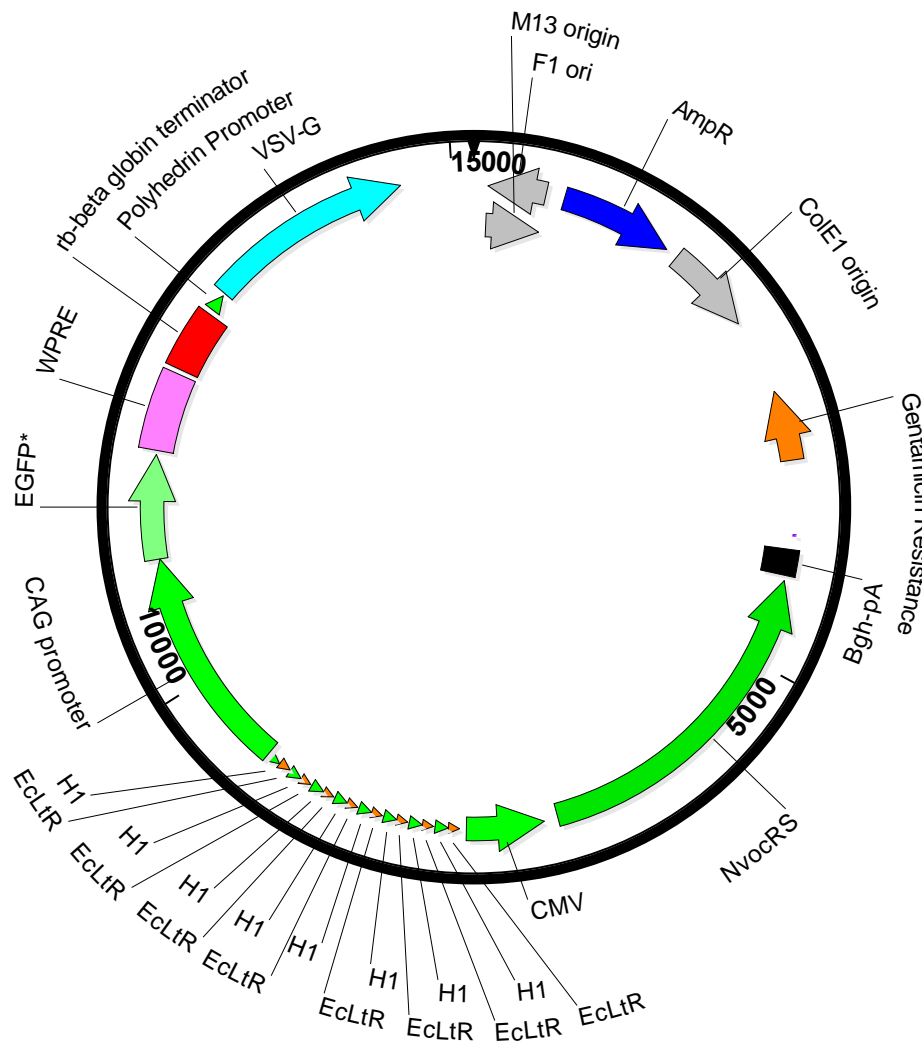

**Supplemental Figure 1.** Plasmid map of pAcBac2- EcLeuRS-BH5 T252A eGFP-39-TAG plasmid

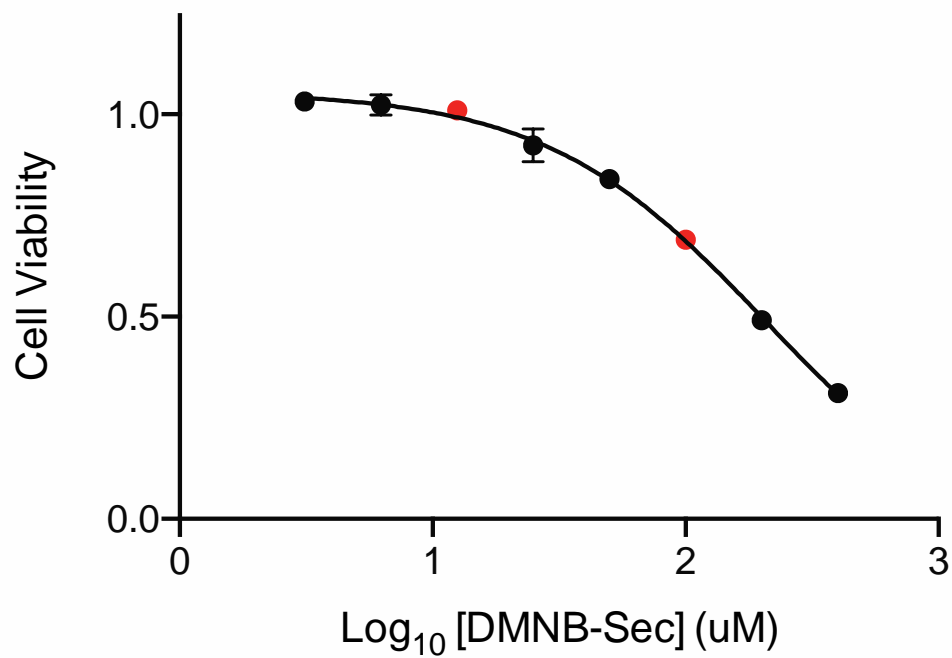

**Supplemental Figure 2.** DMNB-Sec toxicity. Toxicity of DMNB-Sec was monitored by MTT assay. The concentrations of DMNB-Sec used in the paper (12.5  $\mu$ M and 100  $\mu$ M) are highlighted in red. The EC<sub>50</sub> was approximately 207  $\mu$ M.

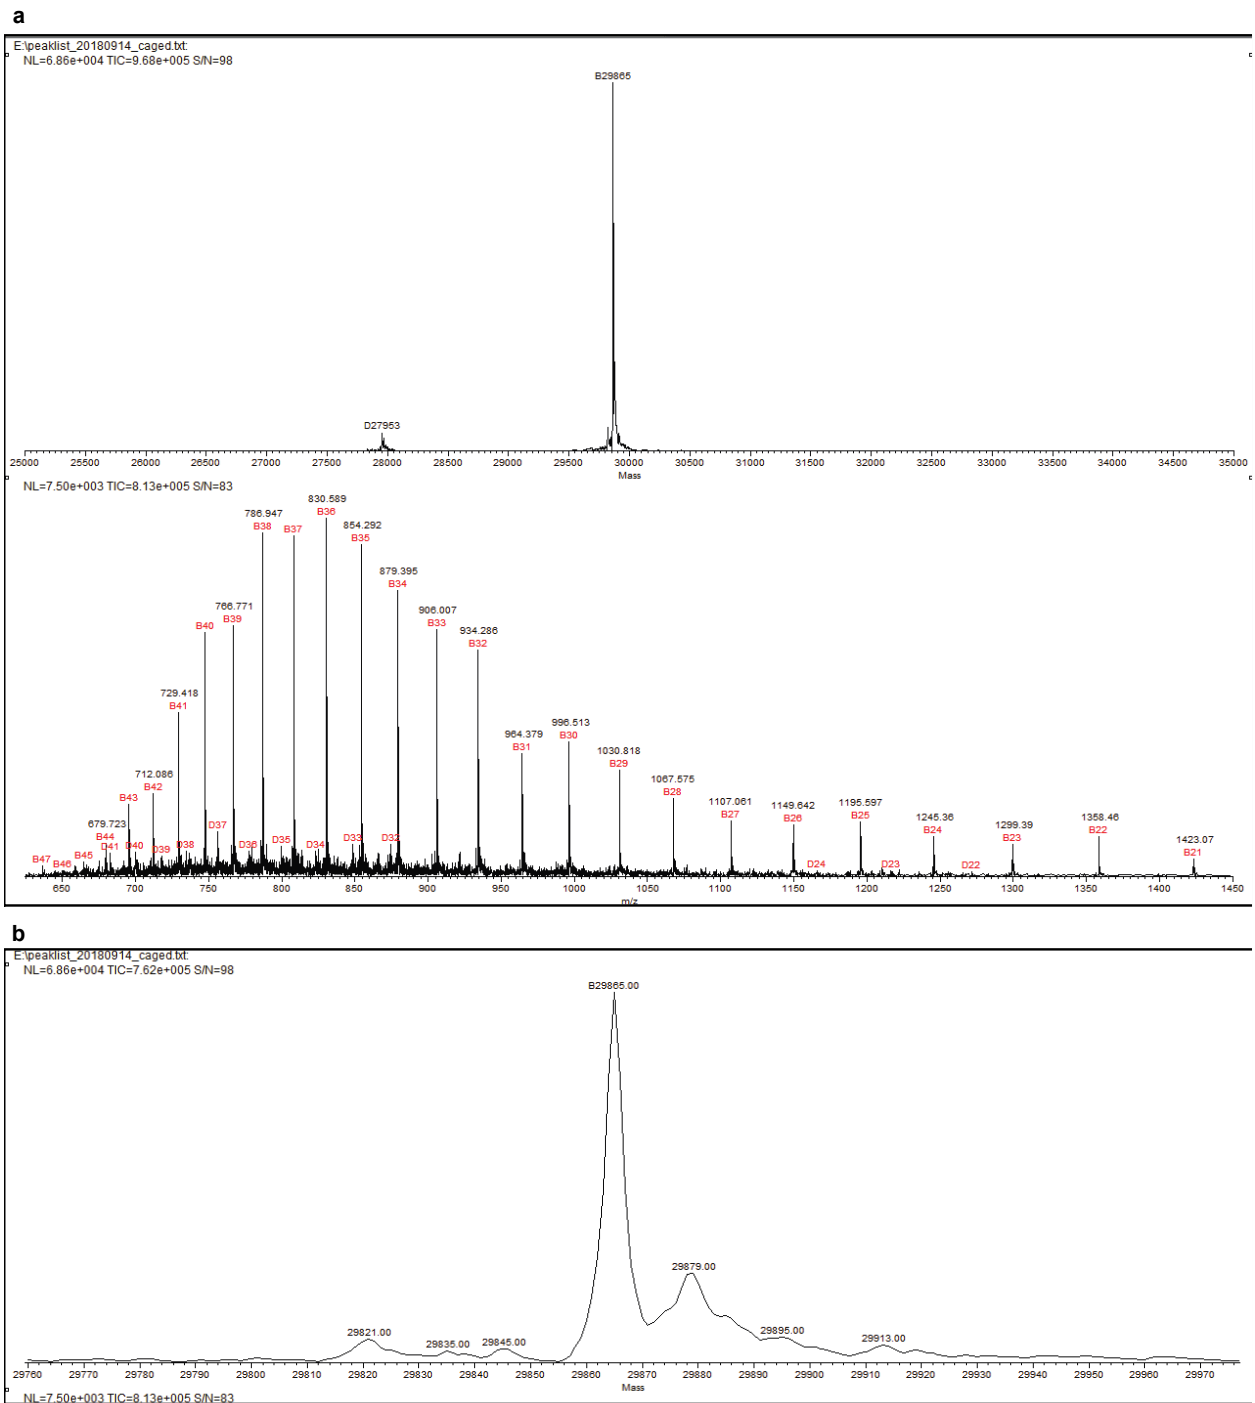

**Supplemental Figure 3.** ESI-MS of eGFP-DMNB-Sec39 (a) Deconvoluted peak shown with mass range from 25000 to 35000 m/z (expected: 29865.33) and spectrum (b) Zoomed in view of deconvoluted peak at 29865 m/z.

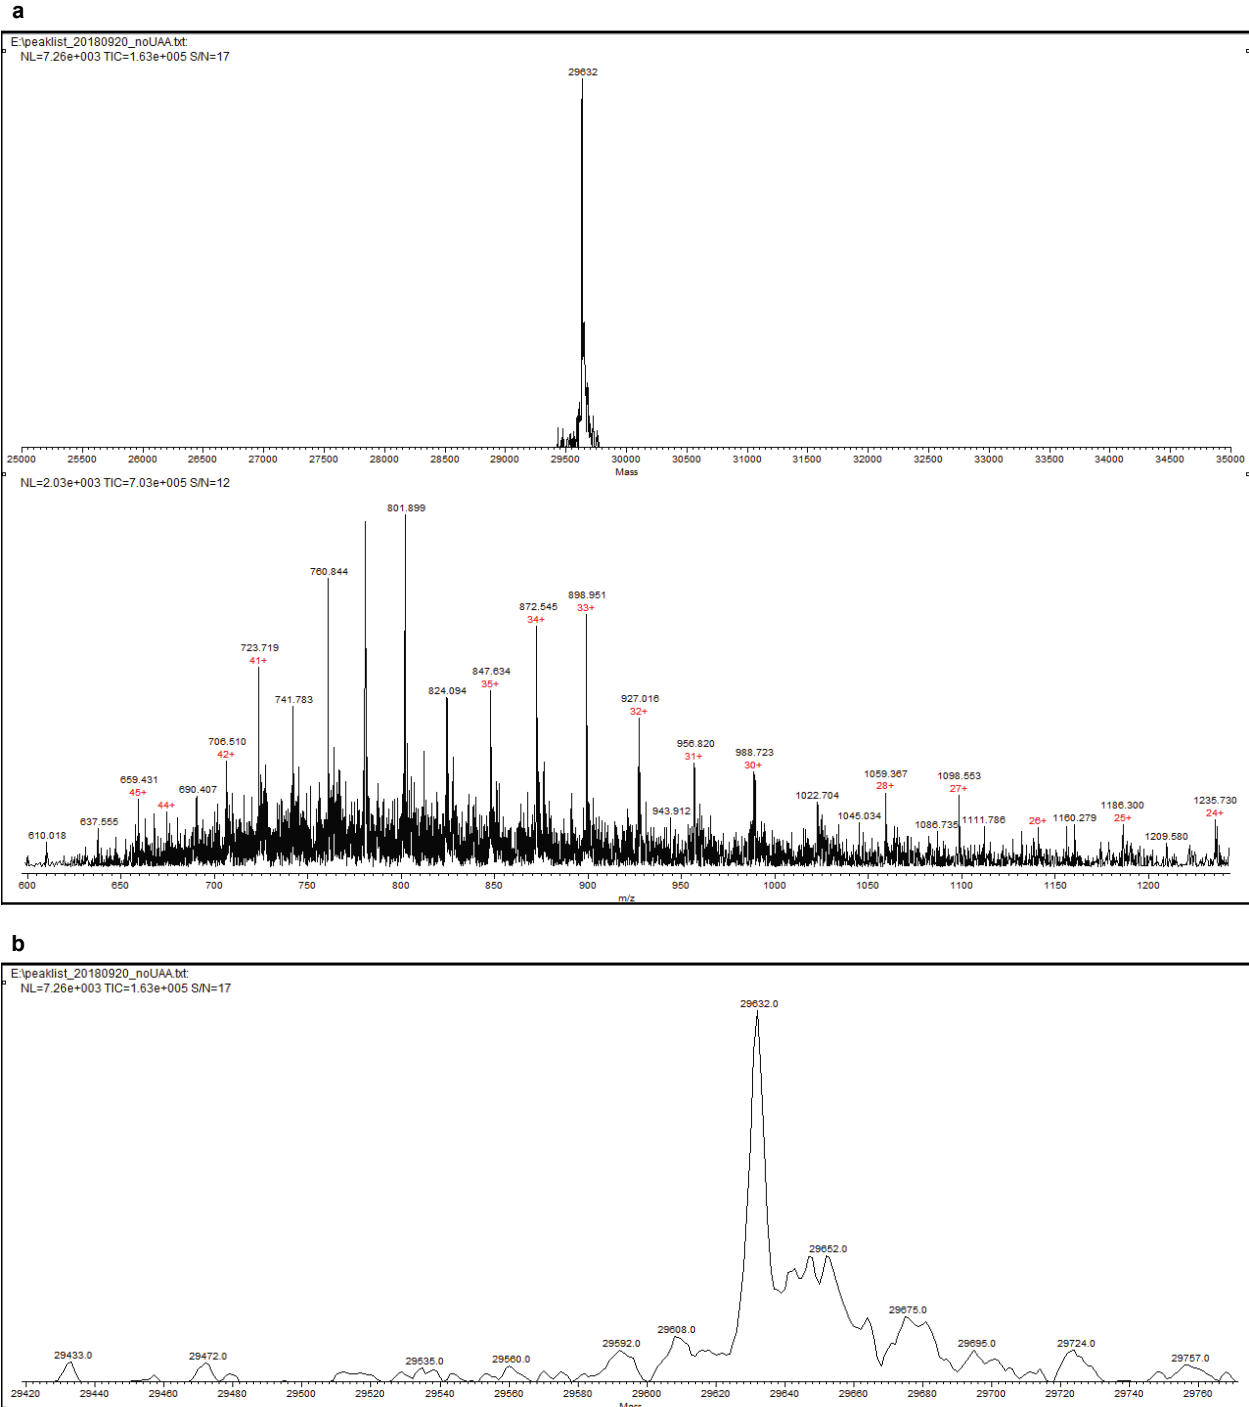

**Supplemental Figure 4.** ESI-MS of eGFP-TAG-39 grown in the absence of DMNB-Sec (a) Deconvoluted peak shown with mass range from 25000 to 35000 m/z and spectrum. The expected mass for eGFP with Leu/Ile incorporated at position 39 is 29632.350. Leu incorporation is likely due to retained ability of the engineered *E. coli* Leu RS to charge tRNA with Leu in the absence of a preferred substrate. (b) Zoomed in view of deconvoluted peak at 29632 m/z.

a

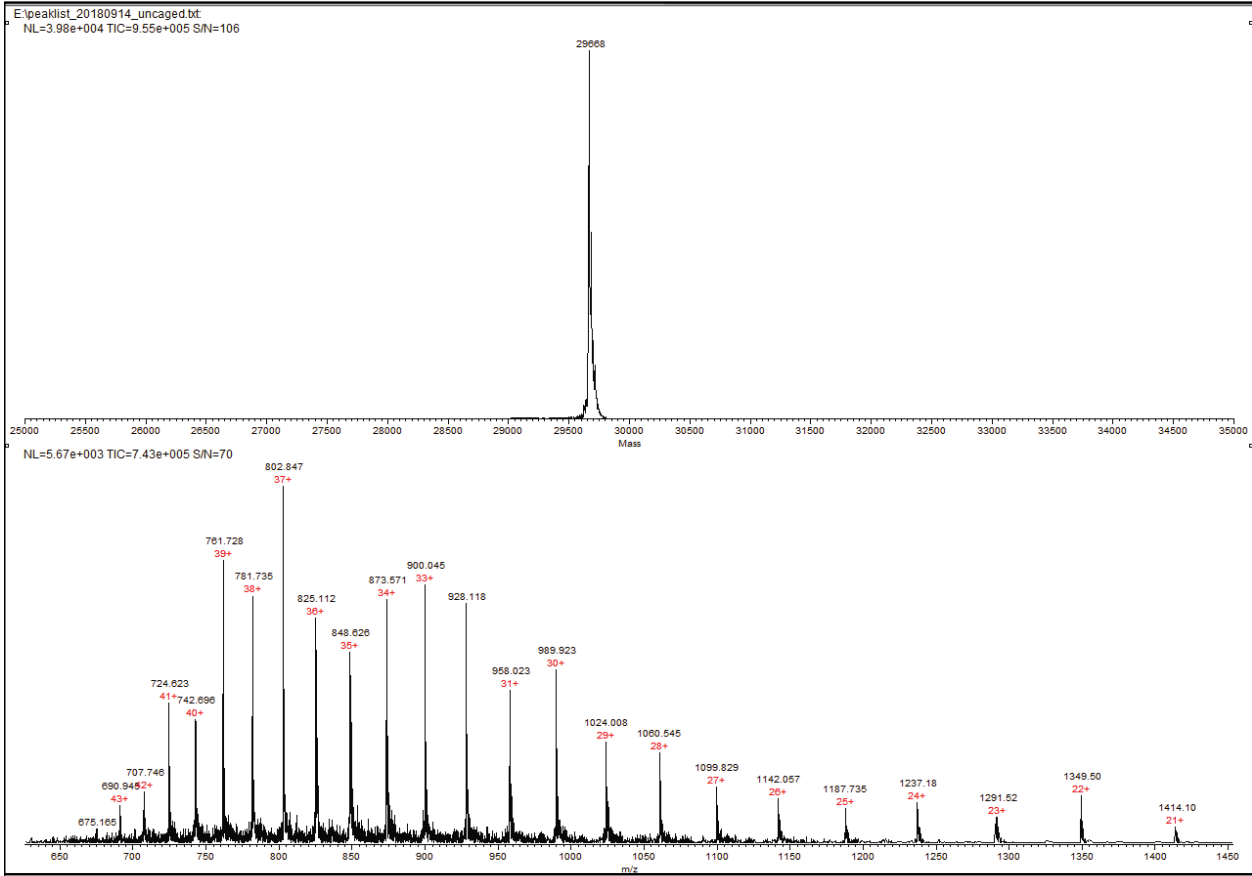

b

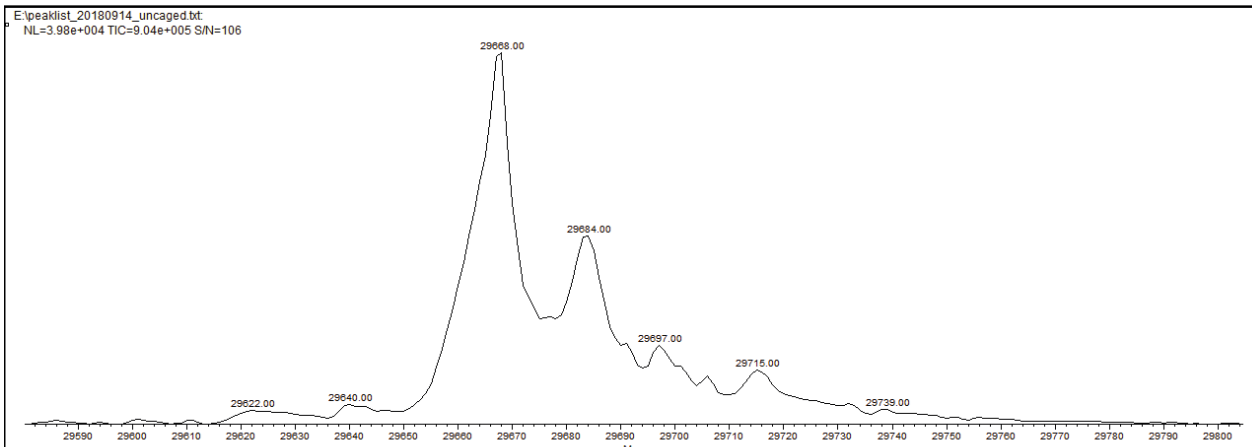

**Supplemental Figure 5.** ESI-MS of eGFP-Sec39 (a) Deconvoluted peak shown with mass range from 25000 to 35000 m/z (expected: 29669.24) and spectrum (b) Zoomed in view of deconvoluted peak at 29668 m/z.

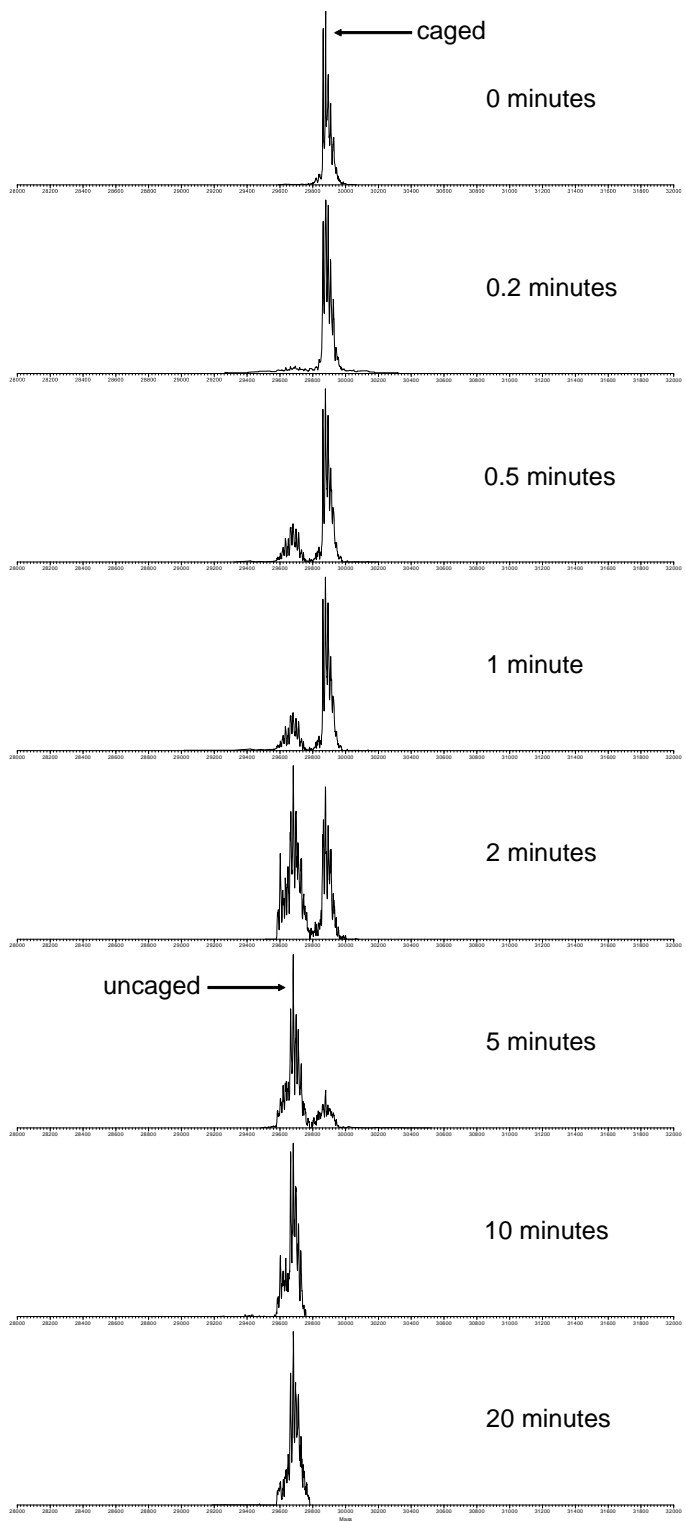

**Supplemental Figure 6.** Time course of eGFP-DMNB-Sec39 uncaging.

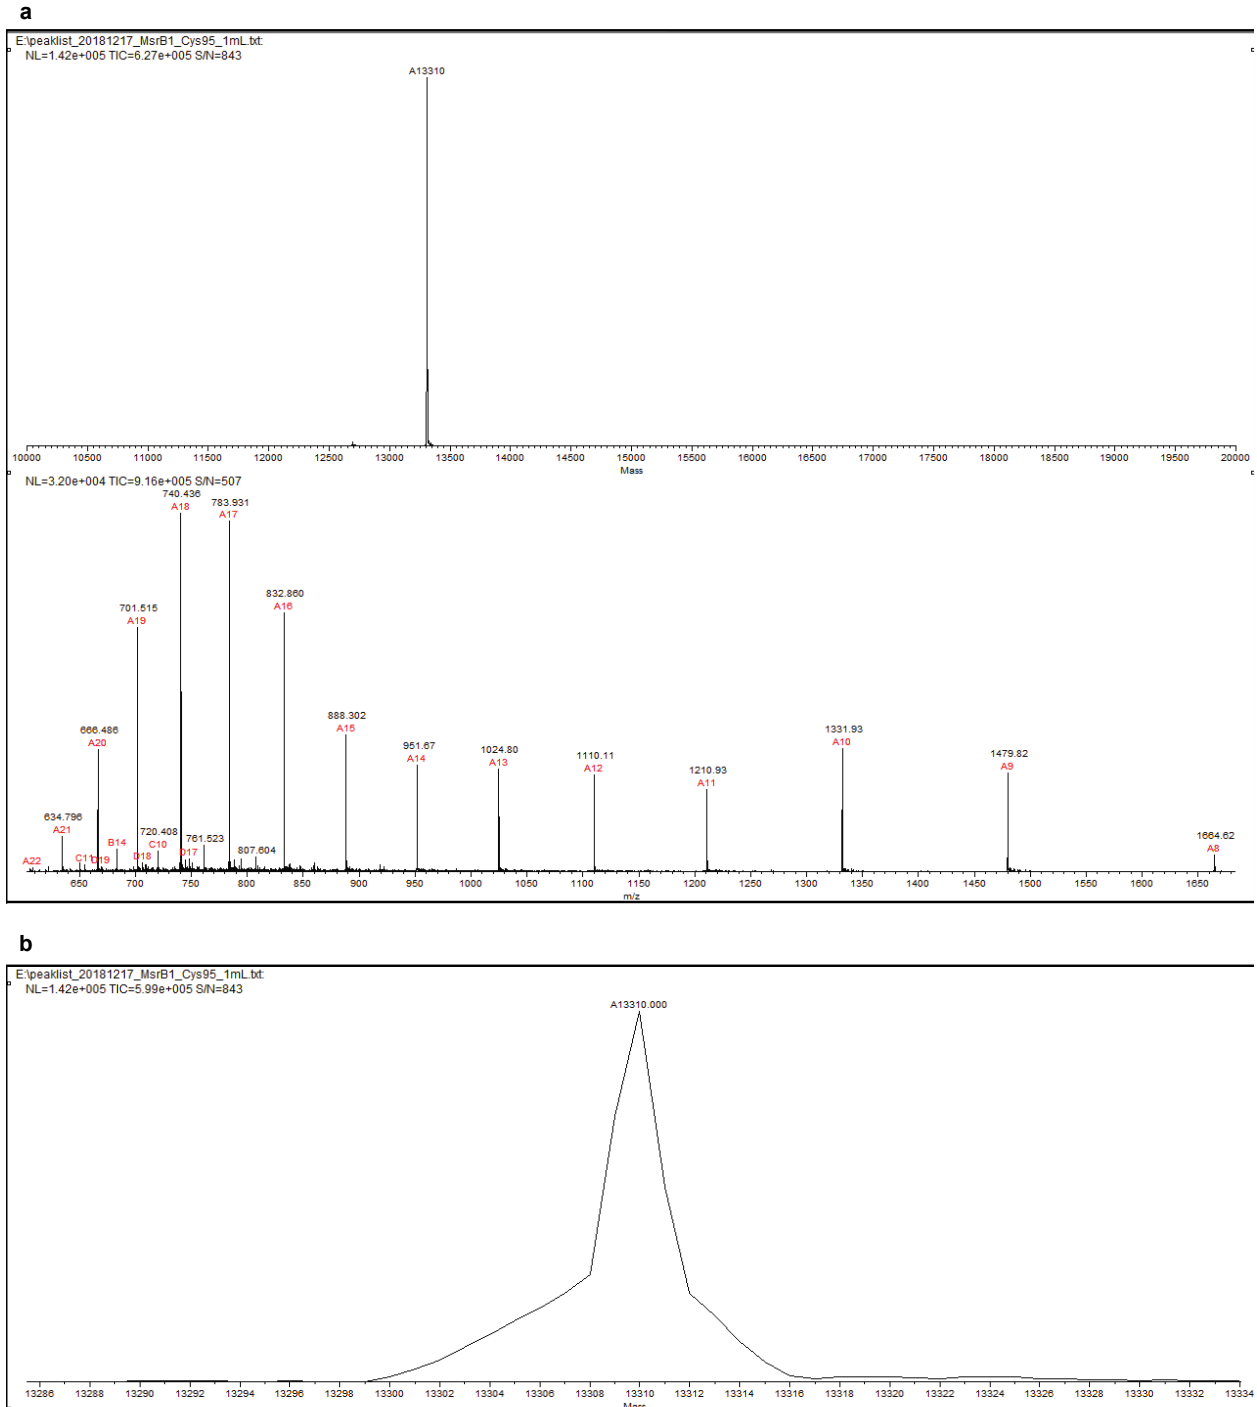

**Supplemental Figure 7.** ESI-MS of MsrB1-Cys95 (a) Deconvoluted peak shown with mass range from 10000 to 20000 m/z (expected: 13309.97) and spectrum (b) Zoomed in view of deconvoluted peak at 13310 m/z.



a

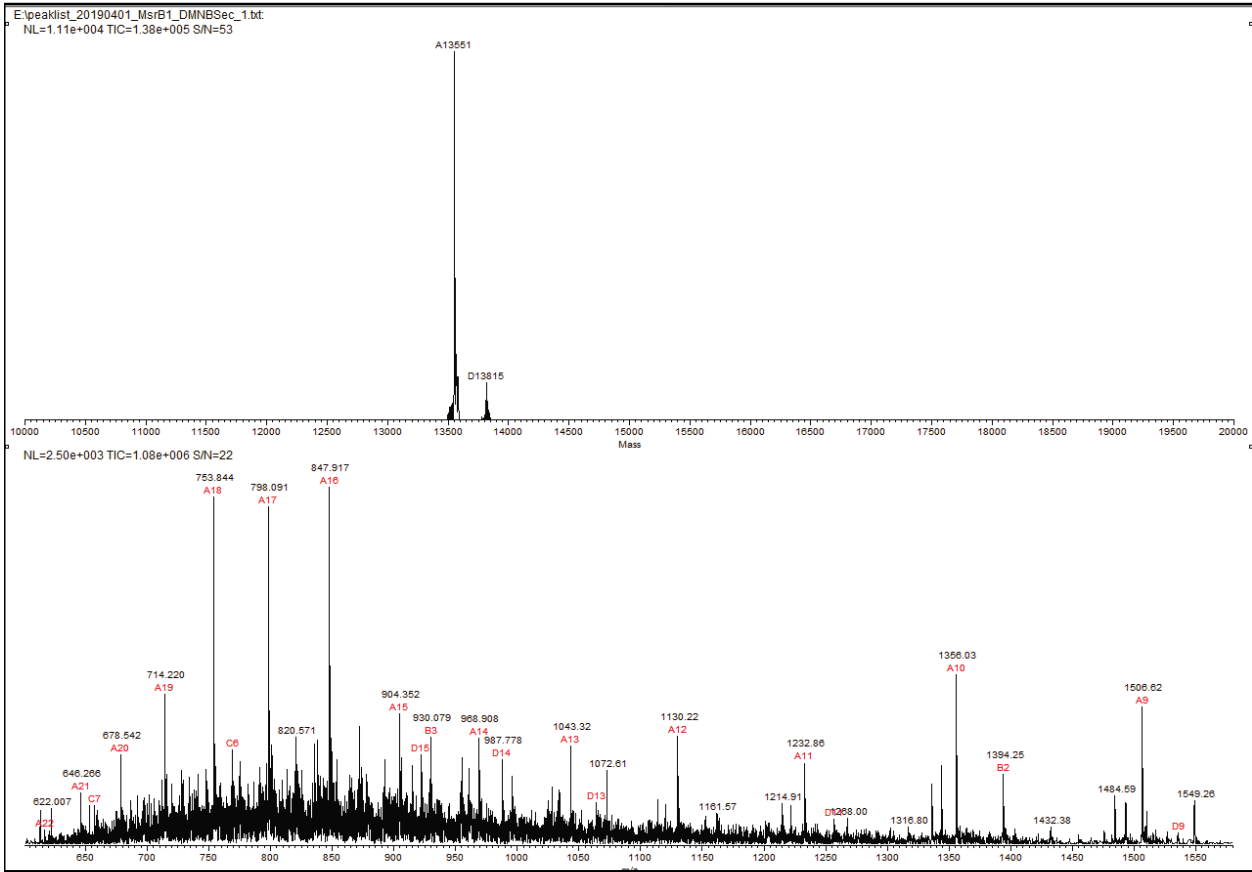

b

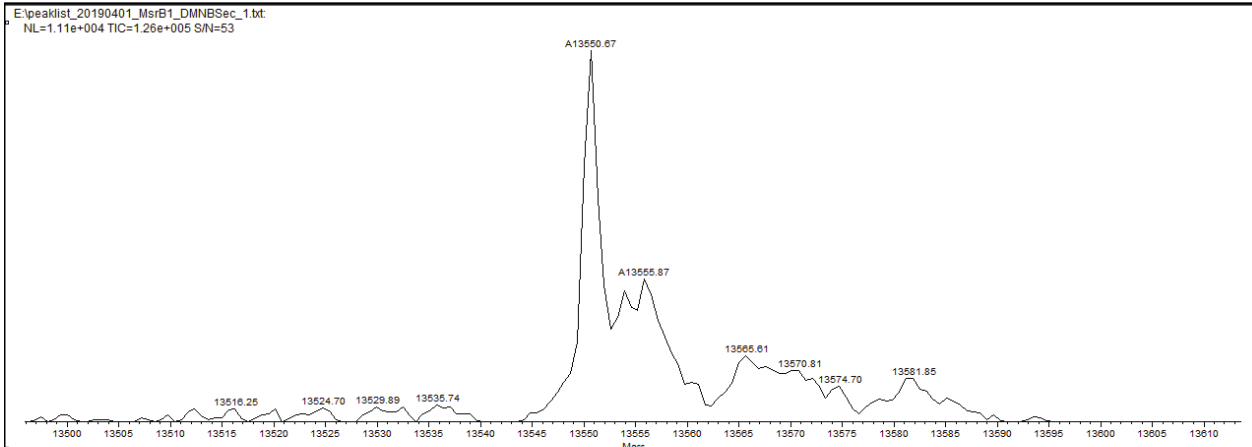

**Supplemental Figure 8.** ESI-MS of MsrB1-DMNB-Sec95 (a) Deconvoluted peak shown with mass range from 10000 to 20000 m/z (expected: 13552.04) and spectrum (b) Zoomed in view of deconvoluted peak at 13551 m/z.

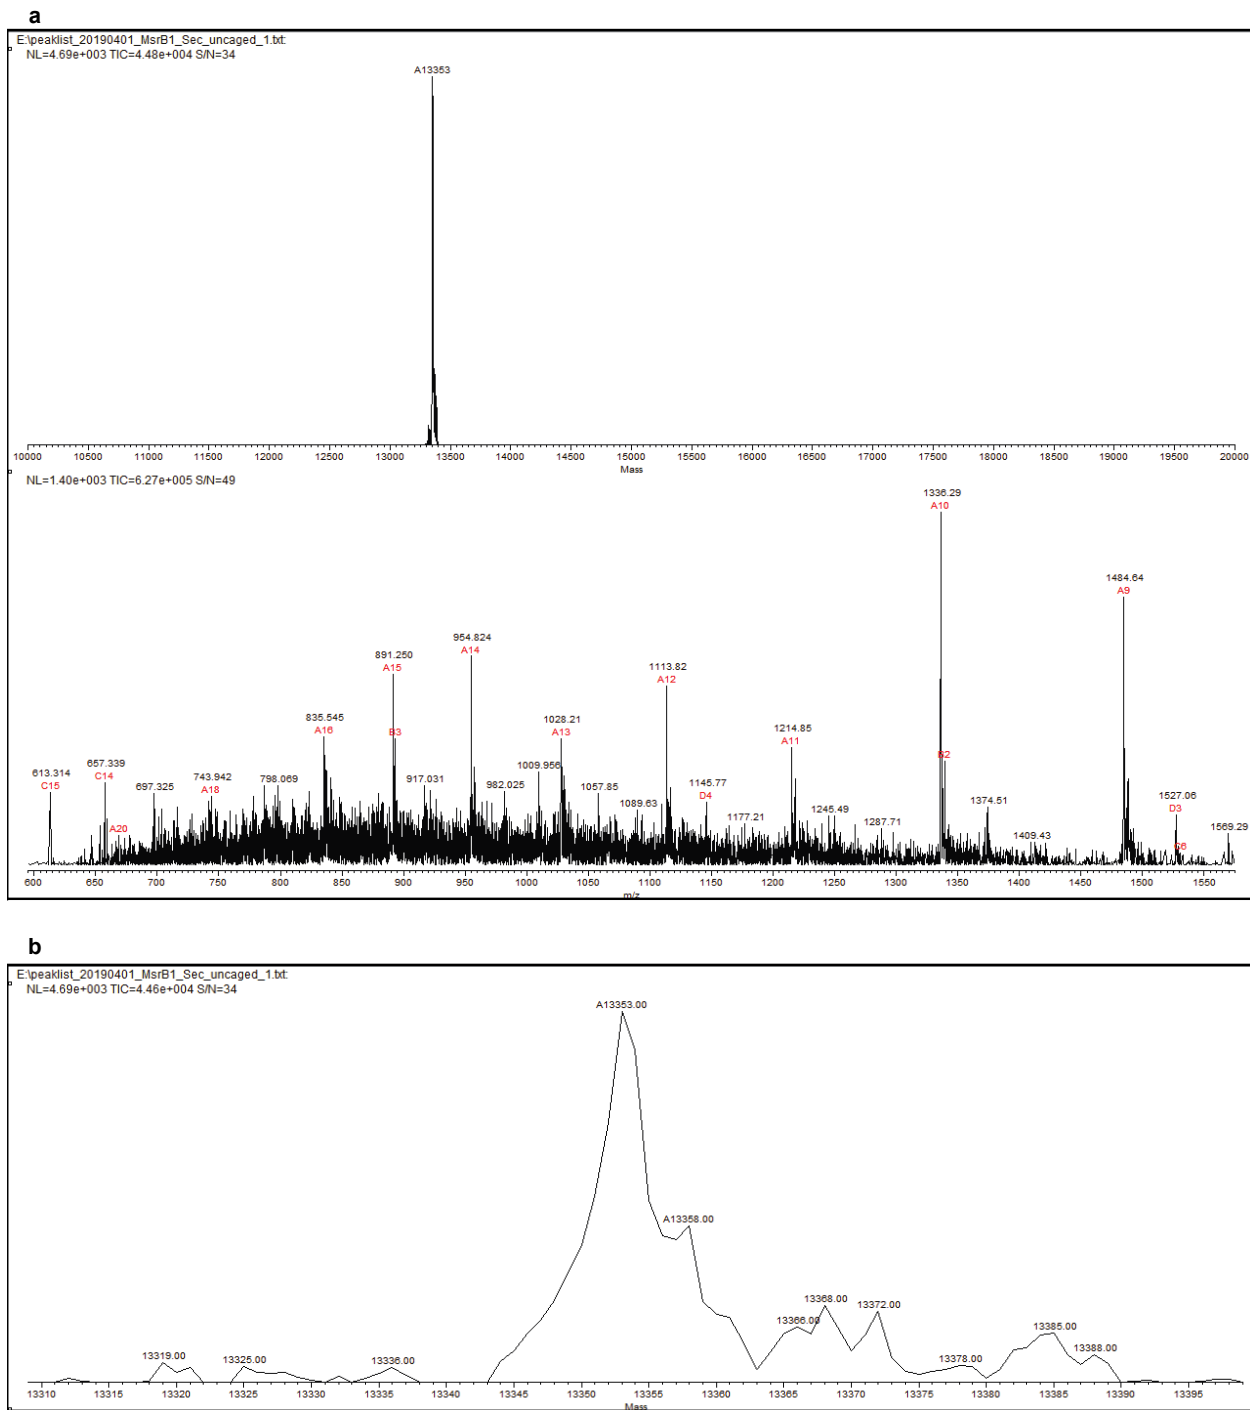

**Supplemental Figure 9.** ESI-MS of MsrB1-Sec95 (a) Deconvoluted peak shown with mass range from 10000 to 20000 m/z (expected: 13356.87) and spectrum (b) Zoomed in view of deconvoluted peak at 1353 m/z.

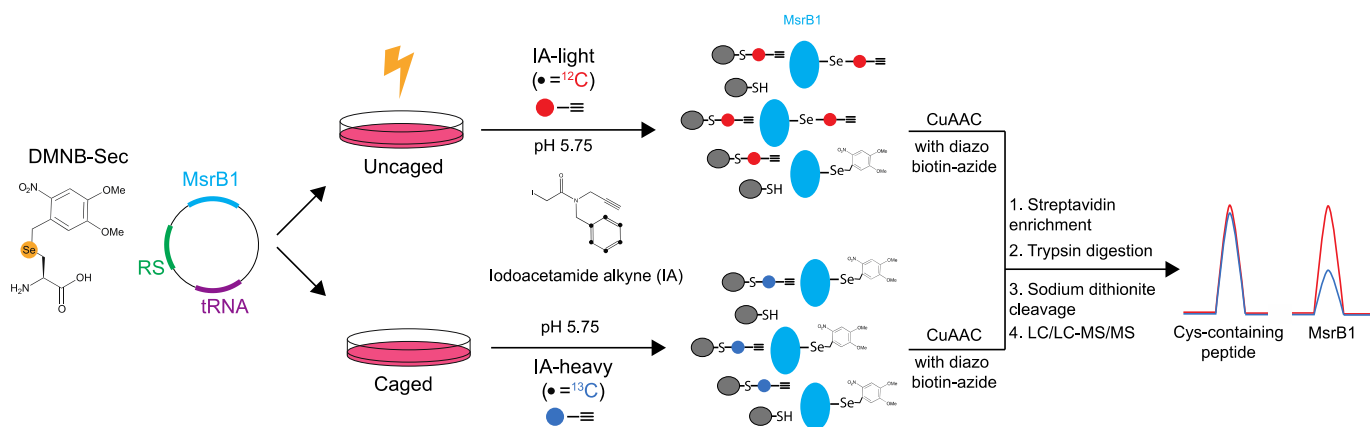

**Supplemental Figure 10.** Selenoprotein peptide enrichment strategy

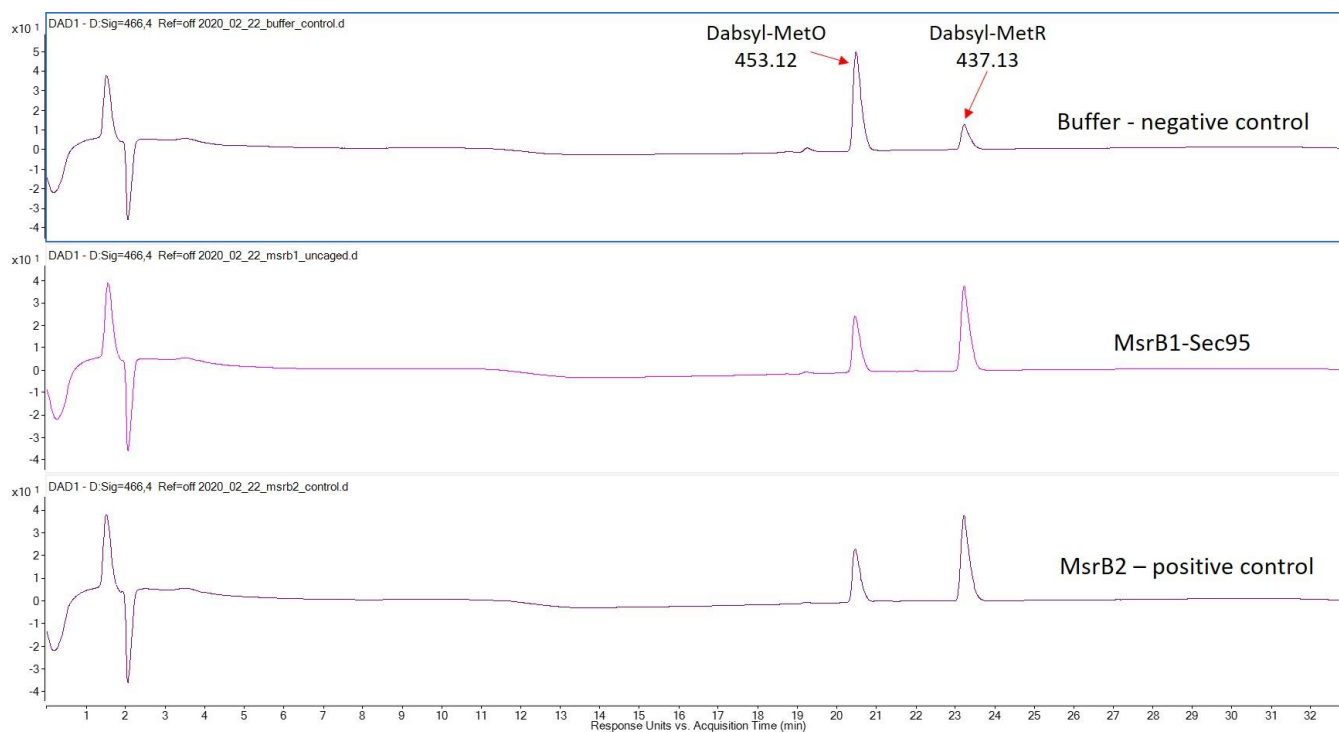

**Supplemental Figure 11.** Reductase activity of purified uncaged MsrB1-DMNB-Sec95. LC/MS traces at 466 nm show relative amounts of oxidized dabsyl-methionine (dabsyl-MetO) and reduced dabsyl-methionine (dabsyl-MetR) in samples treated with buffer (negative control), uncaged MsrB1-DMNB-Sec95, and human recombinant MsrB2 (positive control). Since a racemic mixture of dabsyl methionine was utilized in the assay, complete conversion of dabsyl-MetO would not be expected given the stereospecificity of MsrB1.

## **Methods**

### **Synthesis of DMNB-Sec**

DMNB-Sec was synthesized as previously reported. <sup>1</sup>

### **Cloning of pAcBac2- EcLeuRS-BH5 T252A plasmids**

The eGFP-containing plasmid was generated from the previously reported pAcBac2R-Anap plasmid by replacing the AnapRS with the EcLeuRS-BH5 T252A mutant.<sup>2</sup> The MsrB1-containing plasmid was subsequently generated by replacing the eGFP ORF with the ORF for human MsrB1-6XHis with either cysteine or the amber codon TAG at residue 95, the site of the native selenocysteine.

### **MTT measuring DMNB-Sec toxicity**

HEK293T cells were seeded in 96-well plates (10,000 cells/well) and incubated for 24 hours (37°C, 5% CO<sub>2</sub>). Cells were then treated with 3.125 μM – 400 μM of DMNB-Sec in DMEM (10% FBS, 1% PSA) and incubated for 48 hours (37°C, 5% CO<sub>2</sub>). Treatment media was removed and MTT (Sigma) in clear RPMI media was added and cells were incubated for 4 hours (final MTT concentration 0.575mM). Cells and the formazan dye were solubilized with the addition of 10% SDS (100 μL, in 0.01% HCl aq.), and incubated in the dark overnight at 25°C. Absorbance values (570 nm) were obtained with a SpectraMax M5 (Molecular Devices). Plots and IC<sub>50</sub> values were generated using Prism software.

### **Expression of GFP-Sec and MsrB1**

GFP-6XHis and MsrB1-6XHis variants were expressed in HEK293T cells. For GFP microscopy and fluorescence quantification, transfections were performed in 12-well tissue culture plates. Cells were transiently transfected using 21 μL of serum-free DMEM, 1 μg of plasmid DNA, and 4 μL of 1 mg/mL PEI MAX (Polysciences, 24765-1) and grown in the presence or absence of 100 μM DMNB-Sec for 48 hours.

For protein purification and proteomic analysis, GFP-6XHis variants and MsrB1-6XHis variants were expressed in 10 cm tissue culture dishes, using 210 μL of serum-free DMEM, 12 μg plasmid DNA, and 50 μL of 1 mg/mL PEI MAX for transfection. GFP-DMNB-Sec39 expression was performed in the presence of 100 μM DMNB-Sec and MsrB1-DMNB-Sec95 expression was performed in the presence of 12.5 μM DMNB-Sec.

In order to uncage GFP-DMNB-Sec39 and MsrB1-DMNB-Sec95 (generating GFP-Sec39 and MsrB1-Sec95), cells or purified proteins were irradiated at 365 nm for 10 min on ice using 120 W LED-array (Larson Electronics).

### **GFP quantification**

Cells in a 12-well plate were solubilized in 200  $\mu$ L of CellLyticM (Sigma Aldrich, C2978) and after a 15 min incubation at room temperature, 180  $\mu$ L of lysate was moved to a 96 well plate. Lysates were measured for end point fluorescence with excitation at 488 nm, emission measured at 532 nm, a cutoff at 530 nm, and 100 reads per well using a SpectraMAX M5 (Molecular Devices). Fluorescence was corrected by subtracting the fluorescence of untransfected cells.

## **Protein Purification and LC-MS analysis**

HEK293T cell pellets were solubilized in CellLyticM supplemented with Pierce Universal Nuclease (Thermo Scientific, 88700) and Halt Protease Inhibitor Cocktail (Thermo Scientific, 87786). After 10 min of incubation, lysates were spun at 16800 g. GFP-6XHis and MsrB1-6XHis variants were purified using HisPur Ni-NTA Resin (Fisher Scientific, PI88221) following manufacturer's instructions. After purification, proteins were analyzed by SDS-PAGE and whole protein mass spectrometry (ESI-MS). ESI-MS was performed using a 1260 Agilent Infinity Series HPLC coupled with a 6230 Agilent TOF Mass Spectrometer. Anticipated masses for whole proteins were calculated to include the loss of initiator methionine and addition of acetylation.

## **MsrB1 western blot**

HEK293T lysates were prepared in CellLyticM as described above. Lysates were normalized for protein concentration and run on a 15% polyacrylamide gel at 150 V. Proteins were transferred to a nitrocellulose membrane (Fisher Scientific, 45-004-003) at 75 V for 90 min. Membranes were blocked with 5% BSA in TBST for 1 hour at room temp, and then incubated with antibodies against MsrB1 (Santa Cruz Biotechnology, SC-34846), the 6X His epitope (Cell Signaling Technology, 2365), or GAPDH (Cell Signaling Technology, 2118) overnight at 4 °C. Membranes were washed 3 times with TBST and incubated with HRP-linked secondary antibodies (Abcam, ab97105 for the MsrB1 primary antibody, and Cell Signaling Technologies 7074 for His tag and GAPDH primary antibodies) for 1 hour at room temperature. Membranes were washed 3 times with TBST and incubated with SuperSignal West Pico PLUS chemiluminescent substrate (Fisher Scientific, PI34578). The membranes were imaged with the ChemiDoc MP imaging system (BioRad).

## **Proteomics**

Pellets of HEK293T cells expressing either MsrB1-DMNB-Sec95 (caged) or MsrB1 (uncaged) were resuspended in Selenoprotein Enrichment (SE) buffer (50 mM MES, 50 mM  $\text{NaH}_2\text{PO}_4$ , 100 mM NaCl, pH 5.75).<sup>3</sup> For the uncaged pellet, the SE buffer contained 100  $\mu$ M of iodoacetamide alkyne light (IA-light) while the caged pellet the SE buffer contained 100  $\mu$ M of iodoacetamide alkyne heavy (IA-heavy). Pellets were sonicated for 3 rounds of 10 pulses at 75% amplitude. The lysates were spun down for 5 min at 10,000 g. The lysates were incubated for 1 hour at room temperature, and their protein concentration was determined using the DC Protein Assay (BioRad). Lysates (2.4 mg/mL) were then conjugated to the diazo biotin azide tag (Click Chemistry Tools, 1041-25) via

CuAAC (100  $\mu$ M of diazo biotin azide, 1 mM TCEP [Aldrich, C4706], 100 mM TBTA [Aldrich, 678937], and 1 mM CuSO<sub>4</sub>) for 1 hour at room temperature. Proteins were precipitated by centrifugation (6,500 g, 10 min, room temperature), and washed 3 times with ice-cold methanol (centrifuging at 6,500 g, 10 min, 4 °C). The protein pellet was then resuspended in 1 mL of 1.2% SDS in PBS by sonication and heating (5 min, 95 °C). Samples were diluted in 5 mL of PBS and incubated with 100  $\mu$ L of streptavidin-agarose beads (Thermo Scientific, 20353) and rotated at 4 °C overnight. The beads were then incubated with rotation at room temperature for 3 hours, washed with 0.2% SDS/PBS (5 mL), PBS (3 x 5 mL), and water (3 x 5 mL). Between washes the beads were pelleted by centrifugation (1400 g, 3 min). The beads were transferred to screw-cap Eppendorf tubes and resuspended in 500  $\mu$ L of 6 M Urea in PBS. Samples were treated with 10 mM Ultrapure DTT (Invitrogen, 15508-013) and heated for 20 min at 65 °C. Samples were then alkylated with 20 mM iodoacetamide (ACROS, 122270050) and incubated at 37 °C for 30 min. The beads were pelleted by centrifugation and resuspended in 200  $\mu$ L of 2 M Urea in PBS, 1 mM CaCl<sub>2</sub>, and 2 mg sequence grade modified trypsin (Promega, V5111). The tryptic digestion was allowed to incubate overnight at 37 °C. The beads were washed in PBS (3 x 500  $\mu$ L) and water (3 x 500  $\mu$ L). Labeled peptides were eluted from the beads by sodium dithionite-mediated cleavage of the diazo biotin azide tag. Beads were incubated with 50  $\mu$ L of 25 mM sodium dithionite (Sigma-Aldrich, 161527) in PBS, rotating at room temperature for 1 hour. After centrifugation, the supernatant was collected and saved. The beads were then incubated with 75  $\mu$ L of 25 mM sodium dithionite at room temperature for 1 hour and finally 75  $\mu$ L of 50 mM sodium dithionite at room temperature for 1 hour. All of the collected elutions were combined. The beads were washed twice more with 75  $\mu$ L water, and the washes were combined with the elutions. Formic acid (17.5  $\mu$ L, Sigma) was added to the samples (350  $\mu$ L), and the samples were stored at -20 °C.

Mass spectrometry was performed using a Thermo LTQ Orbitrap Discovery mass spectrometer coupled to an Agilent 1200 series HPLC. Labeled peptide samples were pressure loaded onto 250 mm fused silica desalting column packed with 4 cm of Aqua C18 reverse phase resin (Phenomenex). Peptides were eluted onto a 100 mm fused silica biphasic column packed with 10 cm C18 resin and 4 cm Partisphere strong cation exchange resin (SCX, Whatman), using a five-step multidimensional LC-MS protocol (MudPIT). Each of the five steps used a salt push (0%, 50%, 80%, 100%, and 100%), followed by a gradient of 5-100% buffer B in Buffer A (Buffer A: 95% water, 5% acetonitrile, 0.1% formic acid; Buffer B: 20% water, 80% acetonitrile, 0.1% formic acid). The flow rate through the column was approximately 0.25 mL/min, with a spray voltage of 2.75 kV.

In order to detect MsrB1 peptides, a mass list was used to target the +2 and +3 ions for the Sec-containing peptide in MsrB1 (masses were 721.83 and 481.56 respectively, including IA-light and the cleaved diazo biotin azide tag). One full MS1 scan (400-1800 MW) was followed by 2 data-dependent scans and dynamic exclusion was disabled.

The tandem MS data, generated from the 5 MudPIT runs, was analyzed by the SEQUEST algorithm. The precursor-ion mass tolerance was set at 50 ppm while the fragment-ion mass tolerance was set to 0 (default setting). Static modification of Cys

residues (+57.0215, iodoacetamide alkylation) was assumed with no enzyme specificity. The datasets were searched against human reverse-concatenated non-redundant UniProt Database (release-2012\_11). These datasets were searched for differential Cys modification with IA-light (+306.1481) or IA-heavy (+312.1682) with cleaved diazo biotin azide. Considering SEQUEST does not designate a Sec residue, the datasets collected were searched against a modified UniProt database where all Sec residues were replaced with Cys. These searches were performed with differential modifications on Cys that account for the increased mass of Sec as well as IA-light or IA-heavy and cleaved diazo biotin azide (+354.0925 and +360.1126).

MS2 spectra matches were assembled into protein identifications and filtered using DTASelect2.0 to generate a list of protein hits with a peptide false-discovery rate of 5%, with the `-trypstat` and `-modstat` options applied. Peptides were restricted to fully tryptic (`-y 2`) with a found modification (`-m 0`) and a delta-CN score greater than 0.06 (`-d 0.06`). Single peptides per locus were also allowed (`-p 1`) as were redundant peptide identifications from multiple proteins, but the database contained only a single consensus splice variant for each protein.

Peptide light to heavy (L:H) ratios were calculated using the Cimage quantification package.<sup>4</sup> In order to quantify L:H ratios from MsrB1 peptides residue an additional column and row for selenium and selenocysteine was included into the `cimage.params` table and modified Cys residues in the `DTASelect_filter.txt` file were edited back to Sec.

## Immunofluorescence

HEK293T cells were transfected as above and treated with or without 12.5  $\mu$ M DMNB-Sec. After 24 hours cells were trypsinized and split into 35 mm glassbottom dishes (MatTek Corporation, P35G-1.5-10-C) coated with poly-D-lysine (Sigma-Aldrich, P6407-5MG). After a further 24 hours, cells were irradiated (365 nm, 10 min), returned to the incubator for 10 minutes, and then fixed with 4% paraformaldehyde in PBS (diluted from Thermo PI28906) for 15 minutes at room temperature. Plates were washed 5 times 5 minutes with PBS and blocked for 1 hour at room temperature in PBS with 5% normal serum and 0.3% Tween-20. Cells were incubated with an antibody raised against the C-term 6XHis tag (Cell Signaling Technologies, 12698) at a 1:400 dilution PBS with 1% BSA and 0.3% Tween-20 overnight at 4 °C. Cells were washed 3 times 5 minutes with PBS, then incubated with an anti-rabbit-A594 secondary antibody (Cell Signaling Technologies, 8889) diluted 1:500 in PBS with 1% BSA and 0.3% Tween-20 for 1 hour at room temperature. Cells were washed 3 times 5 minutes, and then mounted with Prolong Gold Antifade reagent with DAPI (Cell Signaling Technologies, 8961S). Images were acquired using a Leica (Wetzlar, Germany) TCS SP5 scanning confocal microscope using a Plan-Apochromat 63 $\times$ /1.40 numerical aperture lens. Images were exported from Leica Application Suite Advanced Fluorescence (LAS AF) software as .tiffs and processed in Adobe Photoshop CC 2019.

## Monitoring MsrB1-Sec95 activity

Purified MsrB1-DMNB-Sec95 (12.4  $\mu$ g) was obtained from the transfection of twenty 10 cm dishes of HEK293T cells with MsrB1-TAG95, co-treated with 12.5  $\mu$ M



DMNB-Sec for 48 hours. Purified protein was buffer exchanged into 30 mM Tris-HCl pH 8.0, and uncaged by exposing to UV light at 395 nm for 10 minutes. MsrB1-Sec95 activity was monitored by the reduction of oxidized dabsyl-Methionine (dabsyl-MetO) as described by Tarrago et. al.<sup>5</sup> Human recombinant 6xHis MsrB2 (12.4 µg in 30 mM Tris-HCl pH 8.0, Cytoskeleton, Inc.) was used as a positive control, while buffer alone was the negative control. Briefly, dabsyl-MetO was prepared by incubating reduced dabsyl-methionine (dabsyl-Met, TCI America) with H<sub>2</sub>O<sub>2</sub> at room temperature overnight. Dabsyl-MetO was isolated using a SEP-PAK® C18 cartridge (Waters) and eluted from the cartridge with acetonitrile:acetate buffer (80:20 v:v). Solvents were removed using rotary evaporation and subsequent lyophilization. The solid was resuspended in 30 mM Tris-HCl pH 8.0, and formation of dabsyl-MetO was confirmed by LC-MS, with an observed mass of 453.13 Da. Solutions of dabsyl-MetO (5 mM) and MsrB1-Sec95 (12.4 µg) with DTT (20 mM) were prewarmed at 37°C for 5 minutes, prior to mixing. Dabsyl-MetO (20 µL) was then added to 180 µL of MsrB1-Sec95 and DTT solution and incubated at 37°C for 30 minutes. The reaction was quenched by the addition of 300 µL acetonitrile and injected onto the LC-MS. Absorbance at 466 nm was monitored to quantify the levels of reduced and oxidized dabsyl-methionine. Area under the curve for the both reduced and oxidized dabsyl-Met were combined to give a value representative of total dabsyl-Met used in the assay. The area under the curve corresponding to reduced dabsyl-Met was divided by the value of total dabsyl-Met, resulting in percentage of reduced dabsyl-Met (dabsyl-MetR).

## Plasmid Sequence

### **pAcBac2- EcLeuRS-BH5 T252A eGFP-39-TAG**

EcLeuRS tRNA/synthetase pairs are in **blue**, GFP reporter is in **green**.

ttctctgtcacagaatgaaaatctctgtcatctctcggttattaatggttgtaattgactgaatatcaacgcttatttgcagcctgaa  
tggcgaatgggacgcgccctgtagcggcgacataagcgcggcggtgtggtggttacgcgagcgtgaccgctacactt  
gccagcgccttagcgcgccgctccttctgcttctccttctccttctcgcacgctcgcggcttccccgtcaagctctaaatcg  
gggctccctttagggctccgatttagtgccttacggcacctcgaccccaaaaacttgattagggatggttcacgtagtg  
gccatcgccctgatagacgggttttcgccccttgacgttgagtcacgcttcttaatagtgactctgttccaaactggaaca  
aactcaaccctatctcggctctattctttgattataagggattttgccgatttcggcctattggttaaaaaatgagctgattaac  
aaaaatfaacgcgaatttaacaaaatattaacgcttacaattcaggtggcacttttcggggaaatgtgcgcggaaccct  
attgtttatcttaatacattcaaatatgtatccgctcatgagacaataaccctgataaatgctcaataatattgaaaaag  
gaagagatgagattcaacattccgtgtcgccctattccctttttgcggcattttgccttctgtttttgctcaccagaaacgc  
tggtaagtaaaagatgctgaagatcagttgggtgcacgagtggttacatcgaactggatctcaacagcggtaagatc  
cttgagagtttcgccccgaagaacgctttccaatgatgagcacttttaaaagtctgtatgtggcgcggtattatcccgattga  
cgccgggcaagagcaactcggctcgcgcatacactattctcagaatgacttggtgagctaccagtcacagaaaag  
catcttacggatggcatgacagtaagagaattatgcagtgctgccataacatgagtgataaactgcggccaacttacttc  
tgacaacgatcggaggaccgaaggagctaaccgctttttgcacaacatgggggatcatgtaactcgccttgatcgttggg  
aaccggagctgaatgaagccataccaacgcagcagcgtgacaccacgatgcctgtagcaatggcaacaacggtgcgc  
aaactattaactggcgaactacttactctagcttcccggcaacaattaatagactggatggaggcggataaagttgcagga  
ccacttctgcgctcggccctccggctggctggttattgctgataaatctggagccggtgagcgtgggtctcgcggtatcatt  
gcagcactggggccagatggtaaagccctcccgtatcgtagttatctacagcaggggagtcaggcaactatggatgaac  
gaaatagacagatcgtgagataggtgcctcactgattaagcattggtaactgtcagaccaagtttactatataactttag  
attgatttaaaaacttattttaatttaaaggatctaggtaagatccttttgataatctcatgaccaaaaatcccctaacgtgag  
tttcgttccactgagcgtcagaccccgtagaaaagatcaaaggatcttcttgagatcctttttctgcgcgtaactctgctgctg  
caacaaaaaaaaccaccgctaccagcgggtggtttgttgcggatcaagagctaccaactcttttccgaaggtaactggc  
ttcagcagagcgcagataccaataactgtcctctagtgtagccgtagttaggccaccactcaagaactctgtagcaccgc  
ctacatacctcgtctgctaactctgttaccagtggctgctgccagtggcgataagtcgtgtcttaccgggttgactcaagac  
gatagttaccggataaggcgcagcggctcgggctgaacggggggtcgtgcacacagcccagcttgagcgaacgacct  
acaccgaactgagatacctacagcgtgagcattgagaaagcgcacgcttcccgaagggagaaaggcggacaggtat  
ccgtaagcggcagggctcgaacaggagagcgcacgaggagcttccagggggaaacgcctggatctttatagtcct  
gtcgggttcgccacctctgactgagcgtcgaattttgtgatgctcgtcaggggggaggcctatgaaaaacgccagca  
acgcgcccttttacggttcttgcctttgtctgacctttgtcacaatgttcttctcgttatcccctgattctgtggataaccgta  
ttaccgctttgagtgagctgataccgctcgcgcagccgaacgaccgagcgcagcagtgagcagcaggaagcg  
gaagagcgcctgatcgggtattttctccttacgcacatctgtcgggtatttcacaccgcagaccgcccgtaacctggcaaaa  
tcggttacgggtgagtaataaatggatgccctgcgtaagcgggtgtggcggaacaataaagtcttaactgaacaaaata  
gatctaaactatgacaataaagtcttaacttagacagaatagttgtaaaactgaaatcagtcaggtatgctgtgaaaaagc  
atactggactttgtatggctaaagcaaacctctcattttctgaagtgcaaatgcccgtctattaagagggggcgtggcca  
agggcatggtaaaagactatattcgcggcgttgacaaattaccgaacaactccgcccggggaagccgatctcggcttg  
aacgaattgttaggtggcggctactgggtcgtatcaaaagtcatcacttctcccgtatgcccaactttgtatagagaccac  
tgccggatcgtcaccgtaactctgcttgacgtagatcacataagcaccagcggcttgcctcatgcttgaggagattgatg  
agcgcggtggcaatgccctgctcgggtgctcgcggagactgcgagatcatagatagatctcactacgcccgtgctc  
aaacctgggcagaacgtaagccgcgagagcgcacaacaccgcttcttggtcgaaggcagcaagcgcgatgaatgctt  
actacggagcaagttcccaggtaatcggagtcgggtgatgtggagtaggtggctacgtctccgaactcacgaccga  
aaagatcaagagcagcccgcagatgatttgacttggtcagggccgagcctacatgtgcgaatgatgccatacttgagcca

cctaactttgttttagggcgactgccctgctgcgtaacatcggtgctgctgcgtaacatcggtgctgctccataacatcaaacat  
cgacccacggcgtaacgcgcttgcgcttggatgcccaggcatagactgtacaaaaaacagtcataacaagccatg  
aaaaccgccaactgcgcccgtaccaccgctgcgttcggtaaggttctggaccagttgcgtgagcgcatacgtacttgcat  
acagtttacgaaccgaacaggcttatgtcaactgggtcgtgccttcatccgttccacgggtgctgcgtcaccgggcaacctg  
ggcagcagcgaagtgcaggcatttctgctcctggctggcgaacgagcgcgaaggttcggctccacgcacatcgtcaggcatt  
ggcggccttgcgttcttctacggcaaggtgctgtgcacggatctgccctggctcaggagatcggtagacctcggccgtcg  
cggcgttgcgggtgctgaccccggatgaagtggtcgcacctcggtttctggaaggcgagcatcgtttgtcggcca  
ggactctagctatagtctagtggttggcctacgtaccctgtagtggtatggcagggttgcgcttaatgcgcccgtacaggg  
cgcgtggggataccccctagagccccagctggttcttccgcctcagaagccatagagcccaccgcatccccagcatgC  
CTGCTATTGTCTTCCCAATCCTCCCCCTTGCTGTCTGCCCCACCCCACCCCCAG  
AATAGAATGACACCTACTCAGACAATGCGATGCAATTTCTCATTTTTATTAGGAAAG  
GACAGTGGGAGTGGCACCTTCCAGGGTCAAGGAAGGCACGGGGGAGGGGCAA  
CAACAGATGGCTGGCAACTAGAAGGCACAGTCGAGGCTGATCAGCGGGTTTAAAC  
GGGCCCTCTAGACTCGAGttaaacggggcccgccaacgaccagattgaggagttacctggtacgtaaatca  
ctttacgtacagtaacgccatcaagatatttgcctaccagatgttcttggccagcacgttcggaacctgttctccggtgcgtc  
caccggaacgggtgatttggcacggactttaccgttaacctgcaccacgaccagcgtggagtctccaccatcgttttctg  
cagcaaccggccacggcgcggttgcgatatgccttgcctttcagttctgccacagcgtgaagcagatgtgcgggggta  
acgggtaagcatacggacaacggccagcagtgcttctgcatcagagcgcgatcctgctcggcatcgggtggtgcttctg  
ccagtttgcacatcagctccataatcggcgaattgcgggttgaaggtctgacgacggccgatatcatcgggtcactttagcg  
atcgtttatgcacatcgcgacgcagcgttctgatttcagtcagcgcacacgttcagtgccgcaacatcacctttgctgt  
gtgctcgtaaaccagttccagacacgttccaggaagcggtagcccctccacaccggattcctgcatcagagatcatat  
cagccggagaagcaaacatcataaacagacgaacgggtcgcgcccgttaacctcaacctgcgggtcgatac  
cgtgttcttcgactggacatttgcctatgccggtataaaccagttcatggcctgccgcatcttgccttcacgatacggcctt  
ctcgtcacgttcaacgatagcatcaaccggggaaacccagttacgttgcgggttccgcaacatagtagaaggcatctgc  
cagcaccataccctgacacagcaactgttccgctggtcgtcagagttcaccatgcctgcatcacgcacatcagttgtggaag  
aagcggaaagtagagcagaacataatggcgtgttcaataaccaccaataccgatatccaccggcagccagtagttagcc  
gcttcggaatccagcataccttcttgcactgcgggcaagtgtagcgcgcatacagccaggaggactccataaagggtgcg  
aaagtgtcggttcagcagtgctggcataaccgttaacggtagtttccgcccactccggatctgcttaatcggggtgtaatg  
ccgtccattaccacatcttccggcaggatcaccggcagctggtcgtccggggtcggcattaccggtaccgtcttctagagtca  
ccatcggaatcggcgcgccccagtaacgctgacgggaaacaccccagtcgcgcaggcggtagttcactttacgctcgc  
aacgcccatcgcagtcagttatcggcgatggcgttgaaggccgcttcatggtcaagaccgttgaactcggcagagttgaa  
cagcacgccttttcagtcagggcttgcgagaaagatctggtcagagccgtcagctgccaggataaccggttgatgttc  
aggcgtatttagaggcaaacctgtagtcgcgctggtcgtgccccggtagccgataactgcggcgtgctgactccatc  
aatacgaagtttgcgcccacgggaatttctcggcgttaatgggtgaaccgctttaaagccagtatcgcgcctttttct  
ccatcgtcgcatttcagctcggcaacttgggttacggcattcgtcaataaaggccgccaagtacaggatttttccgccc  
tttctgcgcccagcggatgacccgcagctaccgcccaggtaggtacaaccataaacgcgtccgggcccggtagtgtaaag  
gtcagcgtgtgtcatagtcgttaacgttgaaggtgatctccacgccttcggaacgaccgatccagttacgctgcatttta  
acgggtgtcggccagtgatccagttatccagatcgttgagcagctcgtcagcgtgaagcagtgattttgataaaccactgcgg  
gatctttacgttcaacttggatcgcagcgcaccagcagcagccgtcgataactgttcggttcggcagttacggctcgttc  
ggacaccagttgaccgcagaagcttcttatataaccaggcctttttatacagctcgggtgaagaatttctgttccaacggtagt  
attccggcgtacaggttgcagctcgcggctccagtcataacaaagcccagcattttgagctggttttcatatacgcgatg  
ttgtcgtacgtccacgggtcgggagcgggtgtttttaccgcccgcctccgcaggcagaccaaacgcgtcccagccc  
atcgggtcaggacgttttgcagcatacgtggttagcgggcatcacgtcaccgatggtgtagttacgtacgtggccc  
atgtgtagtcgaccagaaggatagggctgccagacaggcagtaatacttcttctgctcgtcttccggttacttcaaatgtg  
cgcttctcatccaatgaagctgtactttggattctatcttccggggcgtattgctcttccatGGTGGCGGCAAGCT  
TAAGTTTAAACGctagccagcttgggtctccctatagtgagtcgtattaatttcgataagccagtaagcagtggttct

ctagttagccagagagctctgcttatatagacctcccaccgtacacgcctaccgccatttgcgtcaatggggcgggagttgt  
acgacatttggaaagtcccgttgatttgggtgcaaaacaaactcccattgacgtcaatggggtggagacttgaaatccc  
cgtgagtcaaaccgctatccacgcccattgatgtactgcaaaaccgcatcccatggtaatagcgtgactaatacgt  
gatgtactgccaagtaggaaagtcccataaggtcatgtactgggcataatgccaggcgggcccatttaccgtcattgacgtc  
aatagggggcgtacttggcatatgatacacttgatgtactgccaagtgggcagttaccgtaa atagtccaccattgacgt  
caatggaaagtccctattggcgttactatgggaacatacgtcattattgacgtcaatgggcgggggtcgttgggcggtcagc  
caggcgggcccatttaccgtaagttaagtaacgcggaactccatataatgggctatgaactaatgaccccgtaattgattactat  
taataactagtcaataatcaatgtcaacgcgtatatactggcccgtacatcggaagcagcgcgcaaaacGGATCCAAA  
AAATACCCGGAGCGGGACTTGAACCCGCACAGCGCGAACGCCGAGGGATTTAGA  
ATCCCTTGTGTCTACCGATTCCACCATCCGGGCGGTGTCTCTATCACTGATAGGGA  
ACTTATAAGTCTCTATCACTGATAGGGATTTACGTTTATGGTGATTTCCAGAACA  
CATAGCGACATGCAAATATTAGATCCAAAAAATACCCGGAGCGGGACTTGAACCCG  
CACAGCGCGAACGCCGAGGGATTTAGAATCCCTTGTGTCTACCGATTCCACCATC  
CGGGCGGTGTCTCTATCACTGATAGGGAACTTATAAGTCTCTATCACTGATAGGGA  
TTTCACGTTTATGGTGATTTCCAGAACACATAGCGACATGCAAATATTAGATCCAA  
AAAATACCCGGAGCGGGACTTGAACCCGCACAGCGCGAACGCCGAGGGATTTAG  
AATCCCTTGTGTCTACCGATTCCACCATCCGGGCGGTGTCTCTATCACTGATAGGG  
AACTTATAAGTCTCTATCACTGATAGGGATTTACGTTTATGGTGATTTCCAGAAC  
ACATAGCGACATGCAAATATTAGATCCAAAAAATACCCGGAGCGGGACTTGAACCC  
GCACAGCGCGAACGCCGAGGGATTTAGAATCCCTTGTGTCTACCGATTCCACCAT  
CCGGGCGGTGTCTCTATCACTGATAGGGAACTTATAAGTCTCTATCACTGATAGGG  
ATTTACGTTTATGGTGATTTCCAGAACACATAGCGACATGCAAATATTAGATCCA  
AAAAATACCCGGAGCGGGACTTGAACCCGCACAGCGCGAACGCCGAGGGATTTA  
GAATCCCTTGTGTCTACCGATTCCACCATCCGGGCGGTGTCTCTATCACTGATAGG  
GAACTTATAAGTCTCTATCACTGATAGGGATTTACGTTTATGGTGATTTCCAGAA  
CACATAGCGACATGCAAATATTAGATCCAAAAAATACCCGGAGCGGGACTTGAACC  
CGCACAGCGCGAACGCCGAGGGATTTAGAATCCCTTGTGTCTACCGATTCCACCA  
TCCGGGCGGTGTCTCTATCACTGATAGGGAACTTATAAGTCTCTATCACTGATAGG  
GATTTACGTTTATGGTGATTTCCAGAACACATAGCGACATGCAAATATTAGATCC  
AAAAAATACCCGGAGCGGGACTTGAACCCGCACAGCGCGAACGCCGAGGGATTTA  
GAATCCCTTGTGTCTACCGATTCCACCATCCGGGCGGTGTCTCTATCACTGATAGG  
GAACTTATAAGTCTCTATCACTGATAGGGATTTACGTTTATGGTGATTTCCAGAA  
CACATAGCGACATGCAAATATTAGATCCAAAAAATACCCGGAGCGGGACTTGAACC  
CGCACAGCGCGAACGCCGAGGGATTTAGAATCCCTTGTGTCTACCGATTCCACCA  
TCCGGGCGGTGTCTCTATCACTGATAGGGAACTTATAAGTCTCTATCACTGATAGG  
GATTTACGTTTATGGTGATTTCCAGAACACATAGCGACATGCAAATATTAGATCC  
tgaggCTAGTTATTAATAGTAATCAATTACGGGGTCATTAGTTCATAGCCCATATATG  
GAGTTCCGCGTTACATAACTTACGGTAAATGGCCCGCCTGGCTGACCGCCCAACG  
ACCCCGCCATTGACGTCAATAATGACGTATGTTCCCATAGTAACGCCAATAGGG  
ACTTTCCATTGACGTCAATGGGTGGAgTATTTACGGTAAACTGCCCACTTGGCAGT  
ACATCAAGTGTATCATATGCCAAGTACGCCCCCTATTGACGTCAATGACGGTAAAT  
GGCCCGCCTGGCATTATGCCCAGTACATGACCTTATGGGACTTTCCTACTTGGCAG  
TACATCTACGTATTAGTCATCGCTATTACCATGGTCGAGGTGAGCCCCACGTTCTG  
CTTCACTCTCCCCATCTCCCCCCCCCTCCCCACCCCAATTTTGTATTTATTTATTTT  
TAATTATTTTGTGCAGCGATGGGGGGCGGGGGGGGGGGGGGGGGCGCGCGCCAGGCG  
GGGCGGGGGCGGGGCGAGGGGGCGGGGCGGGGCGAGGCGGAGAGGTGCGGGCGG

CAGCCAATCAGAGCGGCGCGCTCCGAAAGTTTCCTTTTATGGCGAGGCGGGCGGC  
GGCGGCGGCCCTATAAAAAGCGAAGCGCGCGGGCGGGGAGTCGCTGCGTTG  
CCTTCGCCCGTGCCCCGCTCCGCGCCGCCTCGCGCCGCCCGCCCCGGCTCTGA  
CTGACCGCGTTACTCCCACAGGTGAGCGGGCGGGACGGCCCTTCTCCTCCGGGC  
TGTAATTAGCGCTTGGTTAATGACGGCTCGTTTCTTTTCTGTGGCTGCGTGAAAG  
CCTTAAAGGGCTCCGGGAGGGCCCTTTGTGCGGGGGGGAGCGGCTCGGGGGGT  
GCGTGCGTGTGTGTGTGCGTGGGGAGCGCCGCGTGCGGCCCGCGCTGCCCGGC  
GGCTGTGAGCGCTGCGGGCGCGGGCGCGGGGCTTTGTGCGCTCCGCGTGTGCGC  
GAGGGGAGCGCGGCCGGGGGCGGTGCCCGCGGTGCGGGGGGGCTGCGAGGG  
GAACAAAGGCTGCGTGCGGGGTGTGTGCGTGGGGGGGTGAGCAGGGGGTGTGG  
GCGCGGCGGTTCGGGCTGTAACCCCCCTGCACCCCCCTCCCCGAGTTGCTGAG  
CACGGCCCCGGCTTCGGGTGCGGGGCTCCGTGCGGGGCGTGCGCGGGGGCTCGC  
CGTGCCGGGCGGGGGGTGGCGGCAGGTGGGGGTGCCGGGCGGGGCGGGGCC  
GCCTCGGGCCGGGGAGGGCTCGGGGGAGGGGCGCGGCGGCCCGGAGCGCCG  
GCGGCTGTCGAGGCGCGGGCAGCCGCAGCCATTGCCTTTTATGGTAATCGTGCG  
AGAGGGCGCAGGGACTTCCTTTGTCCCAAATCTGGCGGAGCCGAAATCTGGGAG  
GCGCCGCGCACCCCCTCTAGCGGGCGCGGGCGAAGCGGTGCGGGCGCCGGCAG  
GAAGGAAATGGGCGGGGAGGGCCTTCGTGCGTCGCCGCGCCGCGCTCCCCTTCT  
CCATCTCCAGCCTCGGGGCTGCCGCAGGGGGACGGCTGCCTTCGGGGGGGACG  
GGGCAGGGCGGGGTTTCGGCTTCTGGCGTGTGACCGGCGGCTCTAGAGCCTCTGC  
TAACCATGTTTCATGCCTTCTTCTTTTTCTACAGCTCCTGGGCAACGTGCTGGTTaT  
TGTGCTGTCTCATCATTTTGGCAAAGAATTGGCCAAGGAGGCCACCATGGTGAGC  
AAGGGCGAGGAGCTGTTACCGGGGTGGTGCCATCCTGGTTCGAGCTGGACGGC  
GACGTAAACGGCCACAAGTTCAGCGTGTCCGGCGAGGGCGAGGGCGATGCCACC  
TA<sub>g</sub>GGCAAAGCTGACCCTGAAGTTCATCTGCACCACCGGCAAAGCTGCCCGTGCCCT  
GGCCACCCTCGTGACCACCCTGACCTACGGCGTGCAGTGCTTCAGCCGCTACCC  
CGACCACATGAAGCAGCACGACTTCTTCAAGTCCGCCATGCCCGAAGGCTACGTC  
CAGGAGCGCACCATCTTCTTCAAGGACGACGGCAACTACAAGACCCGCGCCGAG  
GTGAAGTTCGAGGGCGACACCCTGGTGAACCGCATCGAGCTGAAGGGCATCGAC  
TTCAAGGAGGACGGCAACATCCTGGGGCACAAGCTGGAGTACAACACTACAACAGCC  
ACAACGTCTATATCATGGCCGACAAGCAGAAGAACGGCATCAAGGTGAACTTCAA  
GATCCGCCACAACATCGAGGACGGCAGCGTGCAGCTCGCCGACCACTACCAGCA  
GAACACCCCATCGGCGACGGCCCCGTGCTGCTGCCCGACAACCACTACCTGAG  
CACCCAGTCCGCCCTGAGCAAAGACCCCAACGAGAAGCGCGATCACATGGTCCTG  
CTGGAGTTCGTGACCGCCGCCGGGATCACTCTCGGCATGGACGAGCTGTACAAG  
GGGCCCTTCGAACAAAACACTCATCTCAGAAGAGGATCTGAATATGCATACCGGTCA  
TCATCACCATCACCATTGAggcctctaaggccgaattcaacgcgtaagtgcacaatcaacctctgattaca  
aaatttgtgaaagattgactggtattcttaactatgttgctcctttacgctatgtggatacgtgctttaatgcctttgtatcatgcta  
ttgctcccgtatggctttcattttctcctccttgataaatcctggtgctgtctctttatgaggagtgtggcccgtgtcaggcaac  
gtggcgtggtgacactgtgtttgctgacgcaacccccactggttggggcattgccaccacctgtcagctcctttccgggactt  
tcgctttccccctccctattgccacggcggaactcatgccgcctgccttggcctgctgacaggggctcggctgttggg  
cactgacaattccgtggtgtgtcggggaatcatcgtcctttccttggctgctcgcctgtgttgccaactggattctgcgcggg  
acgtccttctgtacgtcccctcggccctcaatccagcggaccttcctcccgcggcctgctgccggctctcggcctcttccg  
cgtcttcgcttcgcccctcagacgagtcggatcctcctttggccgctccccgcgtcactttaactcggccagcacagtg  
gtcgatcgaCCAATGCCCTGGCTCACAAATACCACTGAGATCTTTTTCCCTCTGCCAAA  
AATTATGGGGACATCATGAAGCCCCTTGAGCATCTGACTTCTGGCTAATAAAGGAA

ATTTATTTTCATTGCAATAGTGTGTTGGAATTTTTTGTGTCTCTCACTCGGAAGGAC  
ATATGGGAGGGCAAATCATTTAAAACATCAGAATGAGTATTTGGTTTAGAGTTTGGC  
AACATATGCCcATATGCTGGCTGCCATGAACAAAGGTtGGCTATAAAGAGGTCATCA  
GTATATGAAACAGCCCCCTGCTGTCCATTCTTATTCCATAGAAAAGCCTTGACTTG  
AGGTTAGATTTTTTTTATATTTTGTTTTGTGTTATTTTTTTCTTTAACATCCCTAAAATT  
TTCTTACATGTTTTACTAGCCAGATTTTTCTCTCTCTGACTACTCCCAGTCATA  
GCTGTCCCTCTTtGCGGCCGCGgtccgtatactccggaatattaatagatcatggagataaataaataga  
taaccatctcgcaataaataagatcttactgtttcgtaacagtttgaataaaaaaacctataatattccggattatcata  
ccgtcccaccatcgggcgcgAACTCCTAAAAAACCGCCACCatgaagtgcctttgtacttagccttttattcat  
tgggggaattgcaagttcacatagttttccacacaaccaaaaaggaaactggaaaaatgttccttctaattaccattattg  
cccgtcaagctcagatttaattggcataatgacttaataggcacagccttacaagtcaaatgcccagagatcacaagg  
ctattcaagcagacgggtggatgtgcatgctccaaatgggtcactactgtgatttccgctggatggaccgaagtataa  
cacattccatccgatcctcactccatctgtagaacaatgcaaggaaagcattgaacaaacgaacaaggaactggctg  
aatccaggcttccctcctcaaagttggtgatgcaactgtgacggatgccgaagcagtgattgaccaggtagctcctcacc  
atgtgctgggtgatgaatacacaggagaatgggtgattcacagttcatcaacggaaaatgcagcaattacatagcccca  
ctgcccataactctacaacctggcattctgactataaggtaagggtatgtgattctaacctcatttccatggacatcacctt  
cttctcagaggacggagagctatcatccctgggaaaggaggcacaggggtcagaagtaactactttgcttatgaaactg  
gaggcaaggcctgcaaatgcaactgcaagcattggggagtcagactcccacaggtgctggttcgagatggctgat  
aaggatctcttctgctcagaccagattccctgaatgccagaagggtcaagatctctgctccatctcagacctcagtgatgt  
aagtctaattcaggacggtgagaggatctggattattccctctgccaagaaacctggagcaaaatcagagcgggtctcc  
aatctctccagtggtatctcagctatctgtctcctaaaaaccaggaaccggctctgcttcaccataatcaatggtaccctaa  
aatactttgagaccagatacatcagagtcgatattgctgctccaatcctctcaagaatggtcggaatgatcagtggaactac  
cacagaaaggaactgtgggatgactggcaccatataagacgtggaaattggaccaatggagttctgaggaccag  
ttcaggatataagttcctttatacatgattggacatggtatgtggactccgatcttcatcttagctcaaaaggctcaggtgctga  
acatcctcacattcaagacgctgctcgcgaactcctgatgatgagagttatTTTTGGTGatactgggctatccaaaaatcca  
atcgagctttagaagggtggtcagtagttggaagcctctattgctctttttcttatcatagggttaatcattggactattctt  
gggtctccgagttggtatccatctttgcattaaattaaagcacaccaagaaaagacagatttatacagacatagagatgaac  
cgacttggaaagtataaAagcttgtcgagaagtagtagaggatcataatcagccataccacattttagaggtttacttg  
ctttaaaaaacctcccacacctcccctgaacctgaaacataaaatgaatgcaattgttgttgaactgtttattgcagcttat  
aatggttacaataaagcaatagcatcacaatttcacaaataaagcattttttcactgcattctagttgtggtttgtccaaact  
catcaatgtatctatcatgtctggatctgatcactgcttgagcctaggagatccgaaccagataagtgaaatctagttccaa  
actattttgtcatttttaatttctgattagcttacgacgctacaccagttcccatctattttgtcactctccctaaataatccttaa  
aactccatttccaccctcccagttcccaactattttgtccgccacagcggggcatttttctcctgttatgttttaatacaacat  
cctgccaaactccatgtgacaaaaccgtcatcttccggctacttt

## **pAcBac2- EcLeuRS-BH5 T252A MsrB1-Cys95**

eGFP sequence above was removed using Sfil cut sites and replaced with:

```
ATGTCGTTCTGCAGCTTCTTCGGGGGCGAGGTTTTCCAGAATCACTTTGAACCTGGCGTTTACGTGTGTG
CCAAGTGTGGCTATGAGCTGTTCTCCAGCCGCTCGAAGTATGCACACTCGTCTCCATGGCCGGCGTTCAC
CGAGACCATTACGCCGACAGCGTGGCCAAGCGTCCGGAGCACAATAGATCTGAAGCCTTGAAGGTGT
CCTGTGGCAAGTGTGGCAATGGGTTGGGCCACGAGTTCCTGAACGACGGCCCCAAGCCGGGGCAGTCC
CGATTCTGTATATTCAGCAGCTCGCTGAAGTTTGTCCCTAAAGGCAAAGAACTTCTGCCTCCCAGGGTC
ACCATCATCACCATCACTGA
```

## **pAcBac2- EcLeuRS-BH5 T252A MsrB1-95-TAG**

eGFP sequence above was removed using Sfil cut sites and replaced with:

```
ATGTCGTTCTGCAGCTTCTTCGGGGGCGAGGTTTTCCAGAATCACTTTGAACCTGG
CGTTTACGTGTGTGCCAAGTGTGGCTATGAGCTGTTCTCCAGCCGCTCGAAGTATG
CACACTCGTCTCCATGGCCGGCGTTCACCGAGACCATTACGCCGACAGCGTGGC
CAAGCGTCCGGAGCACAATAGATCTGAAGCCTTGAAGGTGTCCTGTGGCAAGTGT
GGCAATGGGTTGGGCCACGAGTTCCTGAACGACGGCCCCAAGCCGGGGCAGTCC
CGATTCTAGATATTCAGCAGCTCGCTGAAGTTTGTCCCTAAAGGCAAAGAACTTC
TGCTCCCAGGGTCACCATCATCACCATCACTGA
```

## **References:**

1. Rakauskaitė, R. *et al.* Biosynthetic selenoproteins with genetically-encoded photocaged selenocysteines. *Chem. Commun.* **51**, 8245–8248 (2015).
2. Mitchell, A. L., Addy, P. S., Chin, M. A. & Chatterjee, A. A Unique Genetically Encoded FRET Pair in Mammalian Cells. *Chembiochem* **18**, 511–514 (2017).
3. Bak, D. W., Gao, J., Wang, C. & Weerapana, E. A Quantitative Chemoproteomic Platform to Monitor Selenocysteine Reactivity within a Complex Proteome. *Cell Chem Biol* **25**, 1157–1167 (2018).
4. Weerapana, E. *et al.* Quantitative reactivity profiling predicts functional cysteines in proteomes. *Nature* **468**, 790–795 (2010).
5. Tarrago, L. *et al.* Monitoring of Methionine Sulfoxide Content and Methionine Sulfoxide Reductase Activity. In *Selenoproteins: Methods and Protocols*, Methods in Molecular Biology; Chavatte, L., Ed., Humana Press: New York, 2018; vol. 1661; pp 285-298.
